# Supplementary material for: Triazatruxene-based thermally activated delayed fluorescence small molecules with aggregation-induced emission properties for solution-processable nondoped OLEDs with low efficiency roll-off
Source: Royal Society of Chemistry journal article supplement (doi:10.1039/c9tc02927c), 2019-01-01
Supplement: c9tc02927c1.pdf [file c9tc02927c1.pdf]

## Electronic Supplementary Information (ESI)

### **Triazatruxene-based thermally activated delayed fluorescence small molecules with aggregation-induced emission property for solution-processable nondoped OLEDs with low efficiency roll-off**

Yang Liu,<sup>ab</sup> Xiaofu Wu,<sup>a</sup> Yonghong Chen,<sup>ac</sup> Liang Chen,<sup>ab</sup> Hua Li,<sup>ab</sup> Weijie Wang,<sup>ab</sup> Shumeng Wang,<sup>a</sup> Hongkun Tian,<sup>ab</sup> Hui Tong<sup>\*ab</sup> and Lixiang Wang<sup>\*ab</sup>

<sup>a</sup> State Key Laboratory of Polymer Physics and Chemistry, Changchun Institute of Applied

Chemistry, Chinese Academy of Sciences, Changchun 130022, P. R. China.

E-mail: chemtonghui@ciac.ac.cn, lixiang@ciac.ac.cn.

<sup>b</sup> University of Science and Technology of China, Hefei 230026, P. R. China.

<sup>c</sup> University of Chinese Academy of Sciences, Beijing 100049, P. R. China.

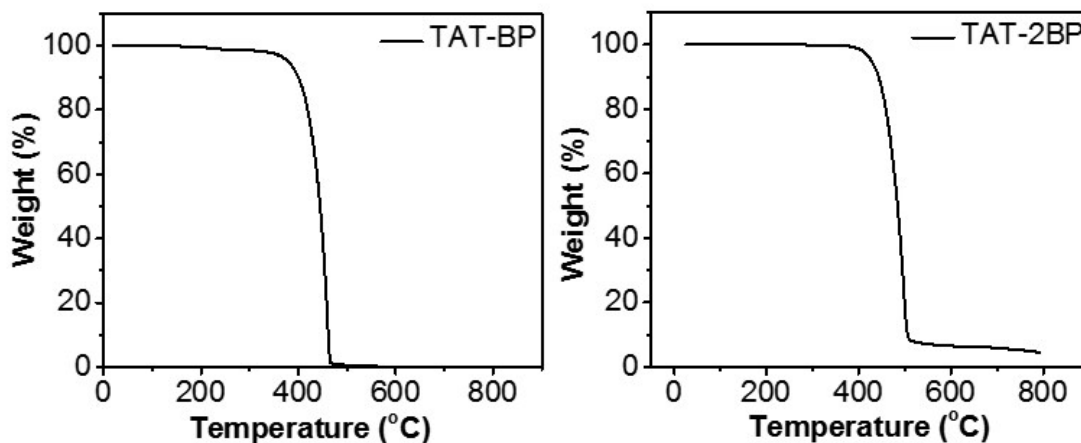

Fig. S1 TGA curves of TAT-BP and TAT-2BP.

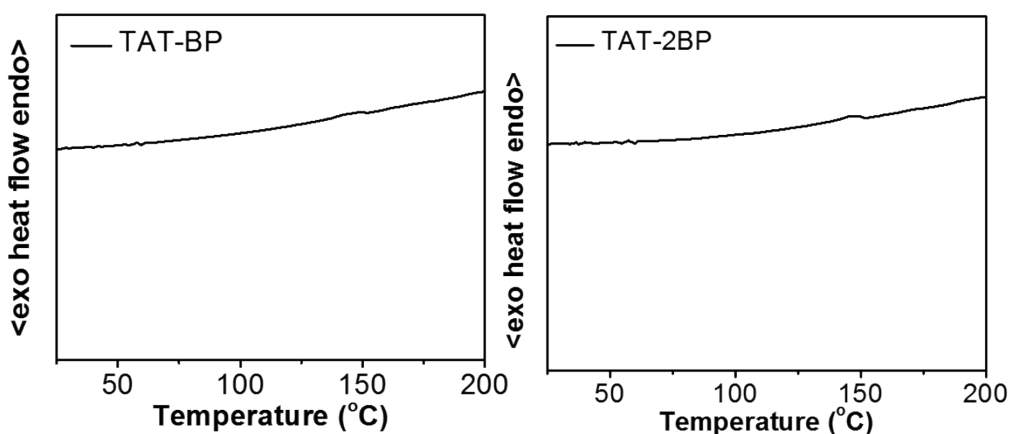

Fig. S2 DSC curves of TAT-BP and TAT-2BP.

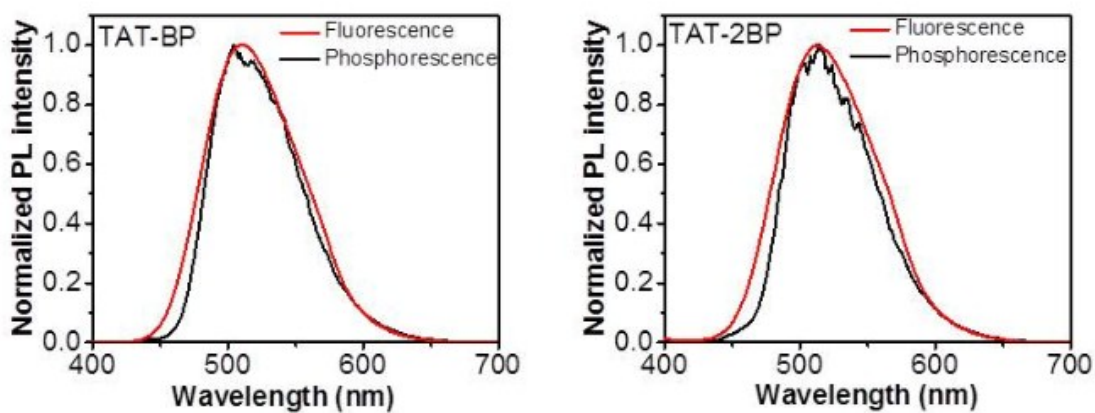

Fig. S3 Fluorescence spectra (red line) at room temperature and phosphorescence at (black line) spectra at 77K of TAT-BP and TAT-2BP in neat films.

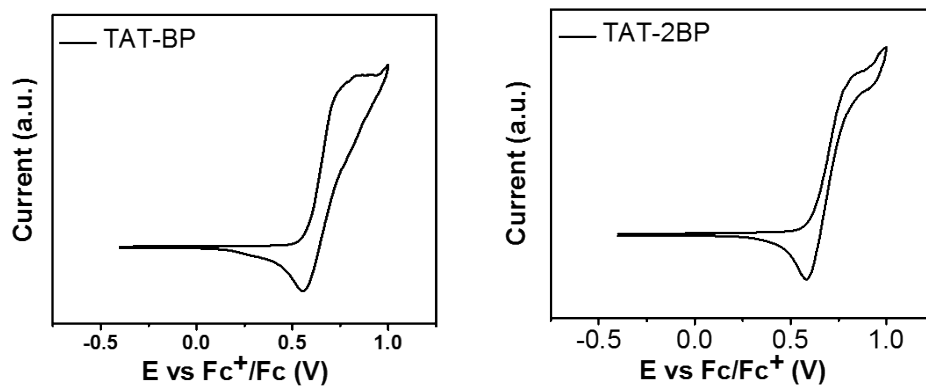

**Fig. S4** Cyclic voltammetry analysis of TAT-BP and TAT-2BP.

**Table S1** DFT calculation results of TAT-BP and TAT-2BP.

| Emitters | HOMO<br>(eV) | LUMO<br>(eV) | $E_g$<br>(eV) | $S_1$<br>(eV) | $T_1$<br>(eV) | $\Delta E_{ST}$<br>(eV) | $f$    |
|----------|--------------|--------------|---------------|---------------|---------------|-------------------------|--------|
| TAT-BP   | -4.91        | -1.82        | 3.09          | 2.68          | 2.59          | 0.09                    | 0.0217 |
| TAT-2BP  | -5.03        | -1.87        | 3.16          | 2.73          | 2.61          | 0.12                    | 0.0346 |

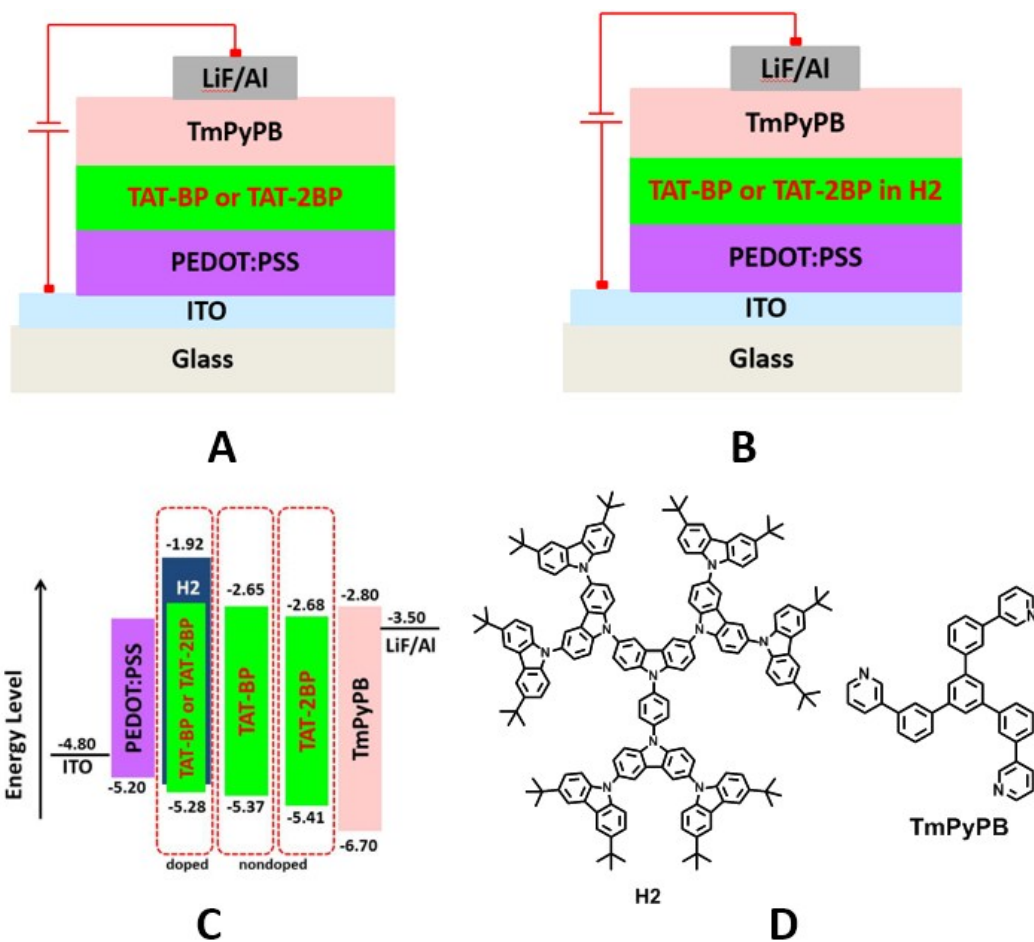

**Fig. S5** (A) Nondoped device configuration. (B) Doped device configuration with 30 wt% emitters doped in H2 host. (C) Energy level diagrams the multilayer OLEDs. (D) Chemical structure of H2 and TmPyPB.

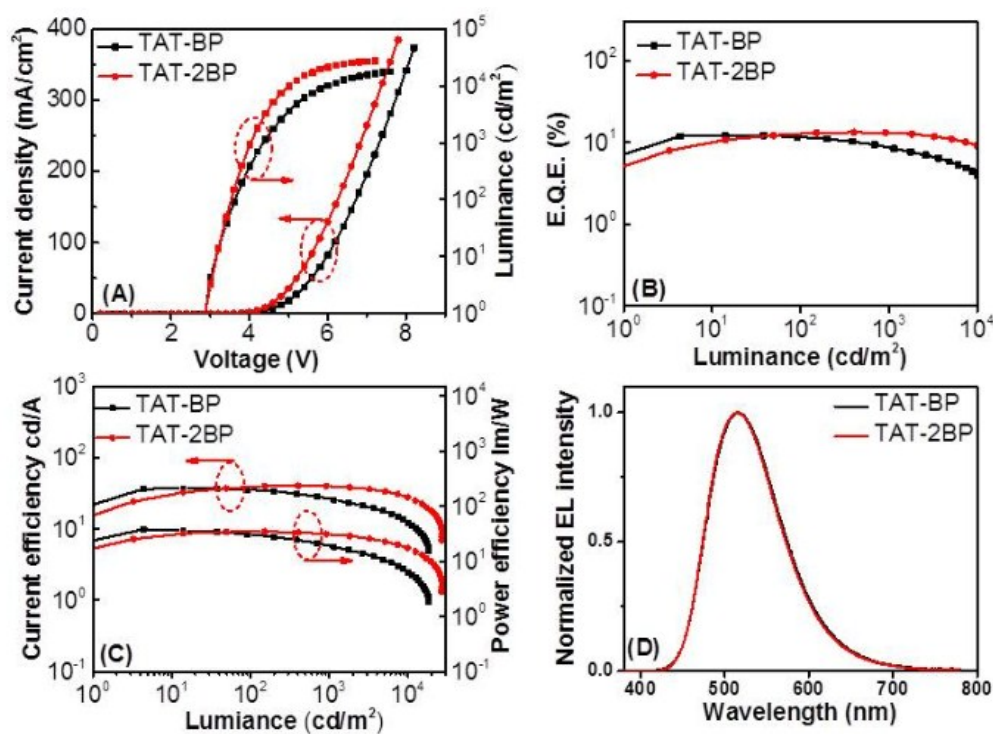

**Fig. S6** EL performance of the OLEDs based on TAT-BP and TAT-2BP doped in H2 host.

(A) The current density-voltage-luminance characteristics. (B) External quantum efficiency-luminance characteristics. (C) Current efficiency-luminance and power efficiency-luminance characteristics. (D) Electroluminescence spectra (EL) at 1000 cd m<sup>-2</sup>

**Table S2** EL performance of the doped OLEDs based on TAT-BP and TAT-2BP.

| Device              | Maximum values      |          |          |        | Values at 1000 cd m <sup>-2</sup> |          |        |                    |
|---------------------|---------------------|----------|----------|--------|-----------------------------------|----------|--------|--------------------|
|                     | V <sub>on</sub> (V) | LE(cd/A) | PE(lm/W) | EQE(%) | LE(cd/A)                          | PE(lm/W) | EQE(%) | Roll-off ratio (%) |
| TAT-BP(30 wt %):H2  | 2.9                 | 37.1     | 38.2     | 12.1   | 26.8                              | 19.7     | 8.8    | 27.3               |
| TAT-2BP(30 wt %):H2 | 2.9                 | 40.4     | 34.8     | 13.2   | 40.0                              | 30.6     | 12.9   | 2.3                |

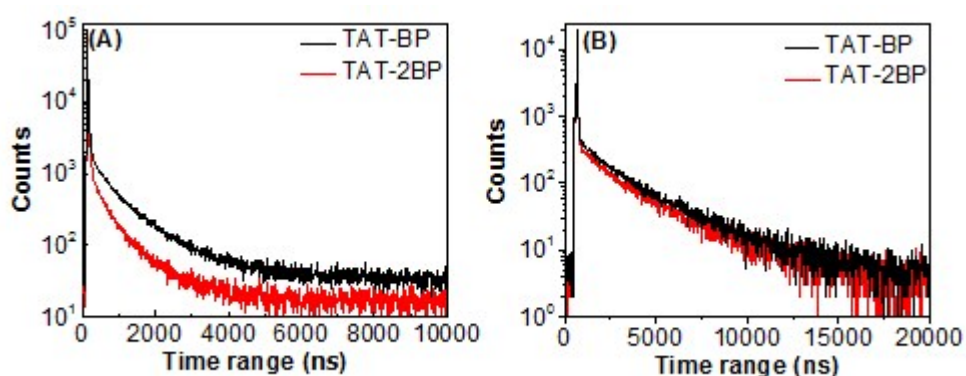

**Fig. S7** Transient photoluminescence decay curves of emitters in neat films (A) and emitters (30 wt %) doped in H2 films (B) measured at 300 K under argon atmosphere.

**Table S3** Fluorescence lifetimes and quantum yields (PLQYs) of the nondoped and doped films of TAT-BP and TAT-2BP.

|                    | $\tau_p$ (ns) | $\tau_d$ ( $\mu$ s) | PLQY |
|--------------------|---------------|---------------------|------|
| TAT-BP neat film   | 46.7          | 0.79                | 51%  |
| TAT-2BP neat film  | 37.3          | 0.54                | 44%  |
| TAT-BP doped film  | 51.3          | 2.15                | 80%  |
| TAT-2BP doped film | 50.2          | 2.04                | 76%  |

The doped films have delay fluorescence lifetimes of 2.15  $\mu$ s for TAT-BP and 2.04  $\mu$ s for TAT-2BP, which are longer than non-doped ones (0.79  $\mu$ s for TAT-BP, 0.54  $\mu$ s for TAT-2BP). Meanwhile, doped films exhibit PLQY of 80% for TAT-BP and 76% for TAT-2BP, which are higher than the non-doped ones (51% for TAT-BP, 44% for TAT-2BP). The longer delayed fluorescence lifetimes and higher PLQYs in doped films should be attributed to the reduced exciton quenching.

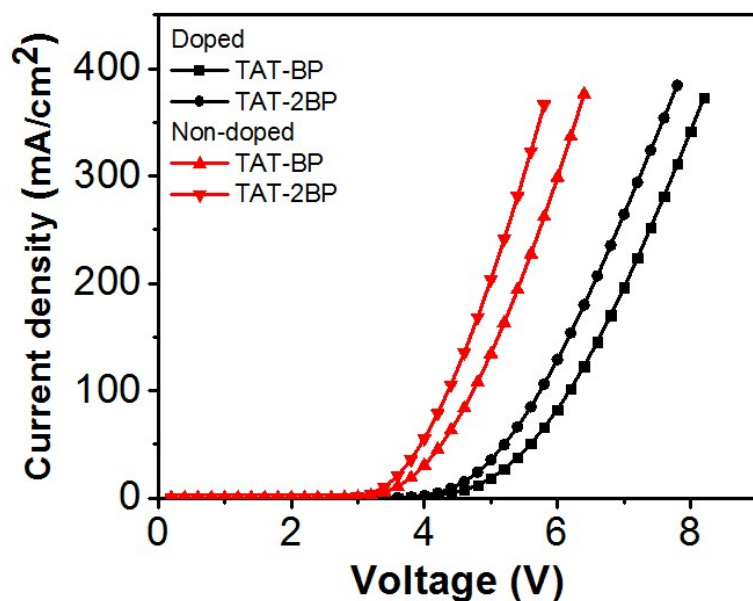

**Fig. S8** The J-V curves of doped (black line) and non-doped (red line) devices based on TAT-BP and TAT-2BP.

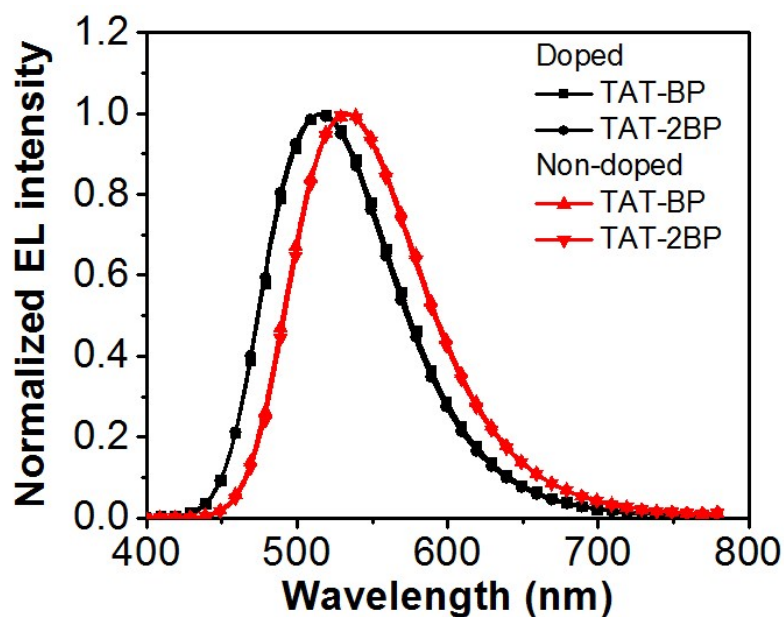

**Fig. S9** The EL spectra of doped (black line) and non-doped (red line) devices based on TAT-BP and TAT-2BP.

TAT-BP and TAT-2BP exhibit similar EL spectra in both doped devices and non-doped devices. Their doped devices show the emission maximum at 516 nm, while their non-doped devices show the emission maximum at 533 nm. Compared to the nondoped devices, the blue-shifted emission in the doped devices should be attributed to the suppressed intermolecular dipole-dipole interaction and weakened intramolecular charge transfer in the less polar doped films.
